1 How well do routine molecular diagnostics detect rifampicin heteroresistance in  
2 *Mycobacterium tuberculosis*?

3

4 Kamela C. S. Ng<sup>a,c,e,#</sup>, Philip Supply<sup>b</sup>, Frank G. J. Cobelens<sup>c</sup>, Cyril Gaudin<sup>d</sup>, Julian Gonzalez-  
5 Martin<sup>e</sup>, Bouke C. de Jong<sup>a</sup>, Leen Rigouts<sup>a,f</sup>

6

7 <sup>a</sup>Mycobacteriology Unit, Department of Biomedical Sciences, Institute of Tropical Medicine,  
8 Antwerp, Belgium; <sup>b</sup>Univ. Lille, CNRS, Inserm, CHU Lille, Institut Pasteur de Lille, U1019 -  
9 UMR 8204 - CIIL - Center for Infection and Immunity of Lille, F-59000 Lille, France;

10 <sup>c</sup>Department of Global Health and Amsterdam Institute for Global Health and Development,  
11 Amsterdam UMC location Academic Medical center, Amsterdam, The Netherlands;

12 <sup>d</sup>Genoscreen, 1 Rue du Professeur Calmette, 59000 Lille, France; <sup>e</sup>Servei de Microbiologia,  
13 Centre de Diagnòstic Biomèdic, Hospital Clínic, Institut de Salut Global de Barcelona,

14 Universitat de Barcelona, Spain; <sup>f</sup>Department of Biomedical Sciences, University of Antwerp,  
15 Antwerp, Belgium

16

17 Running Head: Routine detection of rifampicin heteroresistance

18

19 #Corresponding author, Mycobacteriology Unit, Institute of Tropical

20 Medicine, Nationalestraat 155, 2000 Antwerpen, Belgium; Email: [kng@itg.be](mailto:kng@itg.be); Phone:

21 +32(0)33455345; Fax number: +32(0)32476333

22 **ABSTRACT**

23 Rifampicin heteroresistance – where rifampicin-resistant and -susceptible tuberculosis bacilli  
24 co-exist – may result in failed standard TB treatment and potential spread of rifampicin-  
25 resistant strains. Detection of rifampicin heteroresistance in routine rapid diagnostic tests  
26 (RDTs) allows for patients to receive prompt and effective multidrug-resistant-TB treatment,  
27 and may improve rifampicin-resistant TB control.

28 The limit of detection (LOD) of rifampicin heteroresistance for phenotypic drug susceptibility  
29 testing by the proportion method is 1%, yet is insufficiently documented for RDTs. We  
30 therefore aimed to determine, for the four RDTs (XpertMTB/RIF, XpertMTB/RIF Ultra,  
31 GenotypeMTBDR*plus*v2.0, and GenoscholarNTM+MDRTBII), the LOD per probe and  
32 mutation, validated by colony-forming-unit-counting and targeted deep sequencing  
33 (Deplex-MycTB).

34 We selected one rifampicin-susceptible and four rifampicin-resistant strains, with mutation  
35 D435V, H445D, H445Y, and S450L respectively, mixed them in various proportions in  
36 triplicate, tested them with each RDT, and determined the LODs per mutation type. Deplex-  
37 MycTB revealed concordant proportions of the minority resistant variants in the mixtures.  
38 The Deplex-MycTB-validated-LODs ranged from 20-80% for XpertMTB/RIF, 20-70% for  
39 Xpert Ultra, 5-10% for GenotypeMTBDR*plus*v2.0, and 1-10% for GenoscholarNTM+MTBII for  
40 the different mutations.

41 Deplex-MycTB, GenotypeMTBDR*plus*v2.0, and GenoscholarNTM+MDRTBII, provide explicit  
42 information on rifampicin heteroresistance for the most frequently detected mutations.

43 Classic Xpert and Ultra report rifampicin heteroresistance as rifampicin resistance, while

44 Ultra may denote rifampicin heteroresistance through 'mixed patterns' of wild-type and

45 mutant melt probe melt peak temperatures.

46 Overall, our findings inform end-users that the threshold for reporting resistance in case of  
47 rifampicin heteroresistance is the highest for Classic Xpert and Ultra, to resolve phenotypic  
48 and genotypic discordant rifampicin-resistant TB results.

49 **INTRODUCTION**

50 Resistance to rifampicin (RIF) – the most potent anti-TB drug – is a major barrier to  
51 tuberculosis (TB) control. In 2017, 71% of global RIF resistant-TB (RR-TB) cases were not  
52 diagnosed (1). The diagnosis of RR-TB may be complicated by RIF heteroresistance, observed  
53 in patient samples where RR and RIF-susceptible (RS) strains co-exist (2, 3), which may be  
54 missed and diagnosed as RS because of detection limits. RIF heteroresistance may arise from  
55 an existing resistant clonal subpopulation or from a mixed infection of independent strains  
56 with RR and RS profiles. Such heteroresistance, also known as ‘unfixed’ resistance, precedes  
57 full blown resistance (‘fixed’ resistance, 100% RR) as a result of further resistance selection  
58 under treatment (3-6). Failure to detect these minority resistant variants can thus result in  
59 unsuccessful treatment and potential spread of RR-TB strains (2, 3, 7).

60 The World Health Organization currently endorses use of rapid diagnostic tests (RDTs) for  
61 timely detection of RR-TB strains: XpertMTB/RIF (classic Xpert), Xpert Ultra (Ultra), and the  
62 Line Probe Assays (LPAs) GenotypeMTBDR*plus*v2.0 (LPA-Hain) and Genoscholar  
63 NTM+MDRTBII (LPA-Nipro) (8-10). Among these RDTs, only the LPAs are currently known to  
64 explicitly detect RIF heteroresistance in case of mixtures with mutations covered by the  
65 assay, exemplified by both wild-type and mutant bands being present, also known as ‘mixed  
66 patterns’ (3, 11).

67 In this study, we define RIF heteroresistance limit of detection (LOD) as the minimum  
68 proportion of mutant bacilli in a total mycobacterial population present in a sample, needed  
69 for RIF resistance to be detected (3). It is known that phenotypic drug susceptibility testing  
70 by the proportion method determines at least 1% resistant subpopulation in clinical samples  
71 (3, 12, 13). In the abovementioned RDTs however, the RIF heteroresistance LOD in  
72 association with the specific *rpoB* mutation, is insufficiently documented. In the case of

73 classic Xpert, previous studies report LOD values ranging from 65 to 100% (14, 15), for Ultra,  
74 the first validation study conducted by the manufacturer presented LODs only for mutations  
75 L430P, H445N (20-40%), and S450L (5-10%) (16), whereas LODs of Genoscholar  
76 NTM+MDRTB II have not been reported yet.

77 High coverage depths achieved through pre-selected amplified genes allow targeted deep  
78 sequencing to capture and quantify minority resistant variants of *Mycobacterium*  
79 *tuberculosis* mutants and detect RIF heteroresistance with high sensitivity (17, 18). As an  
80 example of such an approach, Deeplex<sup>®</sup>-MycTB (Genoscreen, France; Deeplex) employs  
81 ultra-deep sequencing of a single, 24-plexed amplicon mix to detect drug resistance-  
82 associated mutations in *M. tuberculosis* complex (MTBC) strains, in addition to  
83 mycobacterial species identification and MTBC strain genotyping, with a 24-48 turnaround  
84 time starting from smear positive clinical samples or primary cultures. Among the 18 main  
85 gene targets associated with 1<sup>st</sup> and 2<sup>nd</sup>- line drug resistance included in Deeplex-MycTB, the  
86 *rpoB* gene – associated with RR - is covered by two amplicons of which one comprises the  
87 main mutation hotspot region also known as the rifampicin resistance determining region  
88 (RRDR) (19).

89 Precise documentation of LODs for most relevant *rpoB* mutations and for the state-of-the-  
90 art RDTs is necessary for timely and more accurate identification of RIF heteroresistance and  
91 prompt initiation of appropriate treatment. Therefore, we determined the LODs of classic  
92 Xpert, Ultra, LPA-Hain, and LPA-Nipro for detecting RIF heteroresistance linked with RR  
93 mutations S450L, D435V, H445D, and H445Y, in relation with the different probes used in  
94 each RDT. These four mutations are most frequently detected in association with RR-TB in  
95 the global MTBC strain population according to large-scale studies (20, 21). We used  
96 simulated mixtures of selected, cultured RR and RS-TB strains, at ratios initially based on

97 colony-forming-unit (CFU) counts after McFarland standardization of the bacillary  
98 suspensions. Targeted deep sequencing by Deeplex-MycTB was used as reference for  
99 quantitative assessment of the RR:RS ratios.

100

## 101 **MATERIALS AND METHODS**

### 102 **Selection of strains**

103 We selected one RS- and four RR- *M. tuberculosis* strains from the Belgian Coordinated  
104 Collection of Microorganisms hosted in the Institute of Tropical Medicine Antwerp (22), on  
105 the basis of the presence of mutations confirmed by Sanger sequencing and captured by  
106 mutation probes of LPA-Hain and LPA-Nipro: the Beijing 2.2.1.1 strains TB-TDR-0090 (ITM-  
107 041208 with *rpoB* mutation S450L (S531L in *E.coli* numbering)) and TB-TDR-0100 (ITM-  
108 041220, D435V (D516V)); the LAM 4.3.4.2 strains TB-TDR-0036 (ITM-000930, H445D  
109 (H526D)) and TB-TDR-0131 (ITM-041289, H445Y (H526Y)) (23). The RS strain was the Euro-  
110 American lineage 4.9 TDR-0140 (ITM-091634, *rpoB* wildtype).

### 111 **Bacillary suspensions and baseline colony-forming-unit (CFU) counting**

112 We prepared two batches of McFarland standard 1 suspensions for each RR and the RS  
113 strain, and performed serial dilution until  $10^{-4}$ - $10^{-6}$ . The first batch was tested by classic  
114 Xpert, LPA-Hain, and LPA-Nipro, and the second batch was prepared to be assessed by Ultra,  
115 which was only released after initial testing. To check if numbers of bacilli were similar  
116 among the cultures after McFarland standardization, we performed CFU counting by spread  
117 plating (Figure S1 a). From each dilution, 100 $\mu$ l was plated in triplicate on Dubos agar plates  
118 that were sealed with a double layer of parafilm, placed in ziplock bags and incubated at  
119 37°C for four weeks, before colony counting.

### 120 **Simulation of RIF heteroresistance**

121 RIF heteroresistance was simulated for each mutation type, by mixing RS and respective RR  
122 strains in triplicate in the following proportions (R:S): 0:100, 1:99, 5:95, 10:90, 20:80, 30:70,  
123 40:60, 50:50, 60:40, 70:30, 80:20, and 100:0 (Figure S1 b), and vortexing the mixtures for 20  
124 seconds. Replicate 3 of each RR:RS mixture per batch was tested by targeted deep  
125 sequencing (Deeplex-MycTB), the results of which served for cross-validation of variant  
126 quantification.

### 127 **Subjection of RR:RS mixtures to RDTs**

128 We subjected mixtures of the RR-TB bacillary suspensions to classic Xpert and Ultra (9, 10),  
129 and thermolysates to LPA-Hain and LPA-Nipro following manufacturer's instructions. We  
130 recorded the LODs and corresponding RDT probe reaction per mutation type, in comparison  
131 with values cross-validated by CFU counts and variant quantification with Deeplex-MycTB.  
132 First reading of the LPA strips was done by the person who prepared the mixtures and  
133 performed the tests, while second reading was done by a colleague who was blinded to the  
134 sample information to ensure objective reading of raw results. Additionally, for LPA-Nipro,  
135 the Genoscholar Reader - a mobile application developed by Nipro (Osaka, Japan,  
136 <https://itunes.apple.com/by/app/genoscholar-reader/id1149733183?mt=8>) was utilized.  
137 In their standard reporting, Classic Xpert and Ultra (Supplemental File Figure S4 a) report RIF  
138 heteroresistance, above or equal its LOD, as RR. Users can indirectly infer RIF  
139 *heteroresistance* from Ultra data, as shown by the simultaneous presence of wild-type and  
140 mutant (Mut) melt peak temperatures at the 'Melt Peaks' tab (Supplemental File Figure S4  
141 b). When generating the results in portable document format, users must tick the 'Melt  
142 Peaks' box to include the melt peak temperatures associated with each wild-type and Mut  
143 melt probe, which may denote RIF heteroresistance, in the extended report (Supplemental  
144 File Figure S4 b). Full resistance is detected by presence of both *rpoB4A* and *rpoB3* Mut melt

145 probes for mutation S450L, whereas RIF heteroresistance is detected only by the *rpoB*4A  
146 Mut melt probe in combination with the corresponding wild-type melt probe (Figure 1).

#### 147 **Quantitative assessment of mutant proportions by Deeplex-MycTB**

148 Per batch, we quantitatively assessed proportions of resistant subpopulations in replicate 3  
149 of the prepared RR:RS mixtures by Deeplex-MycTB. These proportions were determined by  
150 calculating the mean percentages of minority resistant variants across all mutation positions  
151 borne by each of the RR strains in the *rpoB* gene and other gene targets depending on the  
152 strain genetic background.

153 Thermolysates of the RR:RS mixtures prepared as previously described (24) were subjected  
154 to amplicon deep sequencing, using Deeplex-MycTB Kits for the amplification according to  
155 the manufacturer's instructions. Replicates 3 of all first batch mixtures were tested with the  
156 classical 18-gene target version, while replicate 3 of the second batch with S450L-WT  
157 mixtures was tested with a customized version, including 5 gene targets (*rpoB*, *katG*, *inhA*,  
158 *fabG1*, *gyrA*). Amplicons were purified using Agencourt® AMPure® XP magnetic beads  
159 (Beckman Coulter, USA) and quantified by fluorescence quantification in 96-well plates on  
160 Victor. Paired-end libraries of 150-bp read length were prepared using the Nextera XT DNA  
161 Sample Preparation kit (Illumina Inc., San Diego, 160 CA, USA) and sequenced on Illumina  
162 MiniSeq using standard procedures. Variant calling was performed using a dedicated,  
163 parameterized web application developed by Genoscreen. The nominal threshold for calling  
164 minority resistant variants – indicating heteroresistance for drug resistance associated  
165 mutations – is set at a minimum of 3% of all reads, after filtering and depending on the  
166 coverage depths, to minimize false positive calls due to background technical noise (19, 25,  
167 26). Variants present in lower proportions than 3% in the relevant *rpoB* mutation positions



168 were detected separately from the web application,(27) without application of this nominal  
169 threshold in the analysis pipeline.

170

## 171 **RESULTS**

172 After McFarland standardization of the different strain cultures, the mean CFU counts for  
173 dilutions  $10^{-4}$ - $10^{-6}$  of the three replicates of both first and second batches of the different RS  
174 and RR bacillary suspensions were very similar (Table S1 a and b). The proportions obtained  
175 from the Deeplex-MycTB analysis were overall consistent with the expected mixture ratios  
176 and the relative variation seen among CFU counts, as relative deviations from expected  
177 values were limited to 0-16% (Table 1, Figure S2).

178 We excluded replicate 3 from the first batch of S450L-WT preparation due to substantially  
179 high deviation across all mixture ratios, as revealed by Deeplex-MycTB (Supplemental Figure  
180 S3). This deviation potentially reflects pipetting variation or bacillary clumping despite  
181 similar CFU counts of the respective RR and RS strains. Hence for the S450L-WT mixture,  
182 replicate 3 of batch 2 – which was initially only tested by Ultra and Deeplex – was subjected  
183 also to classic Xpert and the LPAs, given the good correlation between the two batches and  
184 to ensure triplicate testing for all mixtures.

185 In line with these levels of experimental variation, all *rpoB* variants from 5:95 RR:RS mixtures  
186 were called by the Deeplex application in proportions ranging from 4.3% (H445Y) to 7.5%  
187 (H445D)(Table 1). When the analysis pipeline was used without applying this threshold,  
188 expected variants of 1:99 mixtures were also detected in percentages ranging from 1.0%  
189 (H445Y) to 1.6% (D435V), which were above background levels of 0.0 to 0.05% detected in  
190 the 0:100 mixtures (i.e. wild type strain only) on these specific sequence positions. The  
191 average minimum coverage depth observed from the Deeplex analyses was 1595 reads.

192 Among the available classical RDTs, LPAs had a lower LOD to detect RIF heteroresistance  
193 compared to classic Xpert and Ultra. The proportion of variants required to be detectable  
194 through LPA-Hain was 5% for mutation S450L and 5-10% for mutations D435V, H445D, and  
195 H445Y (Table S2). LPA-Nipro performed similarly, with 1-5%, 5%, 5-10% and 10% resistant  
196 bacilli detected for mutations S450L, H445D, D435V, and H445Y respectively (Table S2). LPA  
197 reading results were consistent between the two readers. Additionally, the 'automated'  
198 Genoscholar reader had similar results with manual reading for mutations H445Y and S450L;  
199 whereas it had lower sensitivity for mutations D435V (20% Genoscholar reader vs 5%  
200 manual reading) and H445D (10% Genoscholar reader vs 5% manual reading) (Table S3,  
201 Figure S5 a-d).

202 In contrast, Classic Xpert detected mutation S450L only in mixtures with at least 20-40%  
203 resistant bacilli, mutation H445D with at least 40-60% and mutations D435V and H445Y with  
204 at least 70-80% mutant bacilli (Table S2). Likewise, Ultra required a minimum of 20-30%  
205 resistant bacilli to detect mutation S450L, 40-50% for D435V, 40-60% for H445D and 60-70%  
206 for H445Y (Table S2; Figure 1).

207 Notably, in case of S450L at 20% mutant bacilli, only Ultra rpoB4 Mut melt A probe was  
208 observed, whereas both rpoB4 Mut melt A and rpoB3 Mut melt probes were present in case  
209 of 100% S450L (Figure 1). For mutations D435V, H445D, and H445Y only one Mut melt probe  
210 was observed, whether hetero- or fully resistant. The melt peak temperatures did not differ  
211 among hetero- or fully resistant populations for all four mutations tested (Figure 1).

212

## 213 **DISCUSSION**

214 We found that the LPAs detect rifampicin heteroresistance better than classic Xpert and  
215 Xpert Ultra. The LODs we documented differ by capturing RDT probe and mutation type. We

216 inform end-users that in contrast with classic Xpert, Xpert Ultra may denote rifampicin  
217 heteroresistance through ‘mixed patterns’ of wild-type and mutant melt probe melt peak  
218 temperatures.

219 Xpert employs an automated heminested real-time polymerase chain reaction assay in  
220 which short overlapping probes bind to the rifampicin resistance-determining region of the  
221 wild-type *M. tuberculosis rpoB* gene (14, 28). The line probe assays on the other hand rely on  
222 multiplex amplification and reverse hybridization involving both wild-type and mutant  
223 probes on a membrane strip (29). The observed differences in LODs can be linked to the  
224 inherent detecting mechanisms of these RDTs.

225 As seen from the analysis of the different heteroresistant mixtures defined based on  
226 bacterial colony counts, Deeplex-MycTB provided useful information for validating  
227 qualitative observations from the RDTs.

228 The LPA-Hain LOD documented in this study was consistent with a previous study which  
229 employed version 1 of the LPA-Hain kit (3). Further, the initial visual reading of LPA results  
230 was consistent with results of second blinded reading and Genoscholar Reader, although we  
231 observed that the mobile application was less sensitive than visual reading for mutations  
232 D435V and H445D.

233 The LODs recorded for classic Xpert and Ultra were higher (less sensitive) than for the LPAs.  
234 As a foremost example, classic Xpert performed relatively poorly in detecting heteroresistant  
235 mixtures with mutation S450L, which is by far the globally most prevalent allele in RR-TB (9,  
236 21). Nevertheless, the 20-40% LOD we found for classic Xpert was lower (more sensitive)  
237 compared to previous studies which recorded 65-90% LOD (14, 15). Ultra performed  
238 similarly to classic Xpert in detecting minority resistant variants of mutations S450L and  
239 H445D, but did relatively better in capturing those of mutations D435V and H445Y (Table 2).

240 The 20% Ultra LOD for S450L was slightly less sensitive than the 5-10% LOD reported for the  
241 same mutation by Chakravorty and colleagues (16), who tested single mixtures of RR and RS  
242 DNA. We observed higher (less sensitive) LODs for the non-S450L mutations, consistent with  
243 findings of Chakravorty et al. (16).

244 Apart from the slight differences in the LODs recorded for classic Xpert and Ultra, we  
245 observed that Ultra allows users to infer from raw results on the computer screen – under  
246 ‘Melt Peaks’ tab – the phenomenon of heteroresistance (Supplemental File Figure S4 b,  
247 Figure 1), which is not possible from classic Xpert data. RIF heteroresistance may be rapidly  
248 detected by Ultra through observed melt peak temperatures of both wild-type and Mut melt  
249 probes akin to mixed patterns of absent wild-type and developed mutant bands in LPA.

250 Further, in a sample with S450L mutation, observing only the melt peak temperature of  
251 rpoB4 Mut melt A probe (vs rpoB4 Mut melt A and rpoB3 Mut melt probes for 100% RR) and  
252 corresponding wild-type melt probe may also denote RIF heteroresistance (Figure 1).

253 This information is deemed useful for conducting research on Ultra data and could be  
254 practical in the field if export of the melt peak temperatures through the LIS port becomes  
255 feasible in future software updates, together with other raw data (e.g. wild-type and Mut  
256 melt probes associated with RR mutation). Export to connectivity solutions such as

257 DataToCare (Savics, Belgium), GXAlert (SystemOne, USA), or C360 (Cepheid, USA), with  
258 possible integration into e-Health patient charts beyond tuberculosis diagnostics, allows to

259 transform this data into usable information for the National TB Programs using a  
260 combination of unique patient ID and geographical information (9, 30). This may not only

261 greatly benefit the remote resolution of discordant results to improve patient management,  
262 but also aids to build more systematic data on the prevalence and impact of

263 heteroresistance on a programmatic level.

264 Our study has limitations. We performed LPA testing of thermolysates in order to allow  
265 'optimal' reading of results. Routine LPA is commonly done directly on clinical specimens,  
266 where background hybridization is more common and can be harder to distinguish from  
267 heteroresistance, as both phenomena may produce faint(er) bands which are often  
268 disregarded. Thus, the sensitivity for heretoresistance detection that we determined for the  
269 LPAs likely represent the upper bound of values achievable in clinical practice. Moreover,  
270 LPA will not detect heteroresistance for mutations not covered by a mutant probe.  
271 We addressed potential variability resulting from bacillary clumping and pipetting by  
272 inclusion of biological replicates, showing differences in LOD of maximum two dilutions  
273 amongst replicates with the same mutation.

274 In conclusion, we report distinct abilities of LPA-Hain, LPA-Nipro, classic Xpert, and Ultra to  
275 detect the most common RR-conferring mutations in varying mutant proportions against  
276 quantitative results of Deeplex-MycTB. We found that the LPAs have more sensitive LODs  
277 than Ultra, although they detect heteroresistance only for the four most common  
278 undisputed mutations – D435V, H445D, H445Y, and S450L. For mutations without  
279 confirmatory mutant (MUT) band, such as L452P, RIF heteroresistance cannot be detected,  
280 and with faint intensity of the WT band (29), it may be difficult to distinguish between WT  
281 and (hetero)resistance. Ultra on the other hand, can detect RR and RIF heteroresistance  
282 associated with all *rpoB* mutations within the hotspot, albeit requiring a higher proportion of  
283 mutant bacilli than LPA. The LPAs and Deeplex-MycTB provide direct information on the  
284 occurrence of RIF heteroresistance, whereas Ultra, after informing that RR was detected,  
285 may suggest RIF heteroresistance only through additional examination of wild-type and Mut  
286 melt probes and corresponding melt peak temperatures in the raw data on the computer  
287 screen or in the generated extended report (Supplemental File Figure S4 b).

288 The clinical importance of heteroresistance is likely substantial (2), akin to 'fixed', i.e. 100%  
289 resistance. The proportion method for phenotypic drug susceptibility testing, which has  
290 been around for over half a century, by design, tests for  $\geq 1\%$  resistant subpopulations (3, 12,  
291 13), with strong predictive value for poor treatment outcome, at least for the core drugs,  
292 e.g. fluoroquinolones (31) and rifampicin (3). Moreover, samples with  $\geq 5\%$  minority *gyrA*  
293 resistant variants were found to have the same minimum inhibitory concentration level as  
294 that of samples with 100% fluoroquinolone resistance (L. Rigouts, submitted for publication,  
295 (31)), while for *rpoB*, the Mycobacterium Growth Indicator Tube phenotypic drug  
296 susceptibility testing results were similar for samples with  $\geq 5\%$  minority resistant variants  
297 and 100% RIF resistance (3). Taken together, this implicates that in samples with resistant  
298 subpopulations of at least 5%, classification of heteroresistance as 'RR', even when less  
299 sensitive than the proportion method, is probably key, notwithstanding the lack of direct  
300 evidence on clinical impact. Our findings can thus inform and guide TB reference laboratory  
301 staff, healthcare providers, and researchers, that the threshold for reporting resistance in  
302 case of rifampicin heteroresistance is the highest for Classic Xpert and Ultra, to resolve  
303 phenotypic and genotypic discordant rifampicin-resistant TB results. Prospective large-scale  
304 clinical studies using next generation sequencing approaches (2, 7) are necessary to establish  
305 the proportion of mutants that predicts poor outcome of treatment with the specific drug.

306

## 307 **ACKNOWLEDGEMENTS**

308 We thank the Belgian Coordinated Collections of Microorganisms in the Institute of Tropical  
309 Medicine Antwerp (<http://bccm.belspo.be/about-us/bccm-itm>) for the strains tested in this  
310 study; and Siemon Gabriëls, Michèle Driesen, Wim Mulders, Jelle Keyzers, and Pauline  
311 Lempens of the Institute of Tropical Medicine Antwerp Mycobacteriology Unit, and

312 Stéphanie Duthoy and Gaëlle Bisch of Genoscreen for their contribution in the experiments  
313 and data analysis.

314 K.C.S.N. was supported by Erasmus Mundus Joint Doctorate Fellowship grant 2016-1346,  
315 and B.d.J. and L.R by an ERC starting grant INTERRUPTB (311725). The funders had no role in  
316 the study design, data collection and interpretation, or the decision to submit the work for  
317 publication.

318 Philip Supply was a consultant of Genoscreen.

319

## 320 REFERENCES

- 321 1. Organization WH. 2017. Global Tuberculosis Report 2017.
- 322 2. Ley SD, de Vos M, Van Rie A, Warren RM. 2019. Deciphering Within-Host Microevolution of  
323 Mycobacterium tuberculosis through Whole-Genome Sequencing: the Phenotypic Impact  
324 and Way Forward. *Microbiol Mol Biol Rev* 83.
- 325 3. Folkvardsen DB, Thomsen VO, Rigouts L, Rasmussen EM, Bang D, Bernaerts G, Werngren J,  
326 Toro JC, Hoffner S, Hillemann D, Svensson E. 2013. Rifampin heteroresistance in  
327 Mycobacterium tuberculosis cultures as detected by phenotypic and genotypic drug  
328 susceptibility test methods. *J Clin Microbiol* 51:4220-2.
- 329 4. Hofmann-Thiel S, van Ingen J, Feldmann K, Turaev L, Uzakova GT, Murmusaeva G, van  
330 Soolingen D, Hoffmann H. 2009. Mechanisms of heteroresistance to isoniazid and rifampin of  
331 Mycobacterium tuberculosis in Tashkent, Uzbekistan. *Eur Respir J* 33:368-74.
- 332 5. Kimerling ME, Kluge H, Vezhnina N, Iacovazzi T, Demeulenaere T, Portaels F, Matthys F. 1999.  
333 Inadequacy of the current WHO re-treatment regimen in a central Siberian prison: treatment  
334 failure and MDR-TB. *Int J Tuberc Lung Dis* 3:451-3.
- 335 6. Lienhardt C, Cook SV, Burgos M, Yorke-Edwards V, Rigouts L, Anyo G, Kim SJ, Jindani A,  
336 Enarson DA, Nunn AJ, Study CTG. 2011. Efficacy and safety of a 4-drug fixed-dose  
337 combination regimen compared with separate drugs for treatment of pulmonary  
338 tuberculosis: the Study C randomized controlled trial. *JAMA* 305:1415-23.
- 339 7. Metcalfe JZ, Streicher E, Theron G, Colman RE, Allender C, Lemmer D, Warren R, Engelthaler  
340 DM. 2017. Cryptic Microheteroresistance Explains Mycobacterium tuberculosis Phenotypic  
341 Resistance. *Am J Respir Crit Care Med* 196:1191-1201.
- 342 8. Pai M, Nicol MP, Boehme CC. 2016. Tuberculosis Diagnostics: State of the Art and Future  
343 Directions. *Microbiol Spectr* 4.
- 344 9. Ng KC, Meehan CJ, Torrea G, Goeminne L, Diels M, Rigouts L, de Jong BC, Andre E. 2018.  
345 Potential Application of Digitally Linked Tuberculosis Diagnostics for Real-Time Surveillance  
346 of Drug-Resistant Tuberculosis Transmission: Validation and Analysis of Test Results. *JMIR*  
347 *Med Inform* 6:e12.
- 348 10. Ng KCS, van Deun A, Meehan CJ, Torrea G, Driesen M, Gabriels S, Rigouts L, Andre E, de Jong  
349 BC. 2018. Xpert Ultra Can Unambiguously Identify Specific Rifampin Resistance-Confering  
350 Mutations. *J Clin Microbiol* 56.

- 351 11. Tolani MP, D'Souza D T, Mistry NF. 2012. Drug resistance mutations and heteroresistance  
352 detected using the GenoType MTBDRplus assay and their implication for treatment  
353 outcomes in patients from Mumbai, India. *BMC Infect Dis* 12:9.
- 354 12. Canetti G, Fox W, Khomenko A, Mahler HT, Menon NK, Mitchison DA, Rist N, Smelev NA.  
355 1969. Advances in techniques of testing mycobacterial drug sensitivity, and the use of  
356 sensitivity tests in tuberculosis control programmes. *Bull World Health Organ* 41:21-43.
- 357 13. Canetti G, Froman S, Grosset J, Hauduroy P, Langerova M, Mahler HT, Meissner G, Mitchison  
358 DA, Sula L. 1963. Mycobacteria: Laboratory Methods for Testing Drug Sensitivity and  
359 Resistance. *Bull World Health Organ* 29:565-78.
- 360 14. Blakemore R, Story E, Helb D, Kop J, Banada P, Owens MR, Chakravorty S, Jones M, Alland D.  
361 2010. Evaluation of the analytical performance of the Xpert MTB/RIF assay. *J Clin Microbiol*  
362 48:2495-501.
- 363 15. Zetola NM, Shin SS, Tumedji KA, Moeti K, Ncube R, Nicol M, Collman RG, Klausner JD,  
364 Modongo C. 2014. Mixed Mycobacterium tuberculosis complex infections and false-negative  
365 results for rifampin resistance by GeneXpert MTB/RIF are associated with poor clinical  
366 outcomes. *J Clin Microbiol* 52:2422-9.
- 367 16. Chakravorty S, Simmons AM, Rowneki M, Parmar H, Cao Y, Ryan J, Banada PP, Deshpande S,  
368 Shenai S, Gall A, Glass J, Krieswirth B, Schumacher SG, Nabeta P, Tukvadze N, Rodrigues C,  
369 Skrahina A, Tagliani E, Cirillo DM, Davidow A, Denkinge CM, Persing D, Kwiatkowski R, Jones  
370 M, Alland D. 2017. The New Xpert MTB/RIF Ultra: Improving Detection of Mycobacterium  
371 tuberculosis and Resistance to Rifampin in an Assay Suitable for Point-of-Care Testing. *MBio*  
372 8.
- 373 17. Operario DJ, Koeppel AF, Turner SD, Bao Y, Pholwat S, Banu S, Foongladda S, Mpagama S,  
374 Gratz J, Ogarkov O, Zhadova S, Heysell SK, Hout ER. 2017. Prevalence and extent of  
375 heteroresistance by next generation sequencing of multidrug-resistant tuberculosis. *PLoS*  
376 *One* 12:e0176522.
- 377 18. Eilertson B, Maruri F, Blackman A, Herrera M, Samuels DC, Sterling TR. 2014. High proportion  
378 of heteroresistance in *gyrA* and *gyrB* in fluoroquinolone-resistant Mycobacterium  
379 tuberculosis clinical isolates. *Antimicrob Agents Chemother* 58:3270-5.
- 380 19. Makhado NA, Matabane E, Faccin M, Pincon C, Jouet A, Boutachkourt F, Goeminne L, Gaudin  
381 C, Maphalala G, Beckert P, Niemann S, Delvenne JC, Delmee M, Razwiedani L, Nchabeleng M,  
382 Supply P, de Jong BC, Andre E. 2018. Outbreak of multidrug-resistant tuberculosis in South  
383 Africa undetected by WHO-endorsed commercial tests: an observational study. *Lancet Infect*  
384 *Dis* doi:10.1016/S1473-3099(18)30496-1.
- 385 20. Walker TM, Kohl TA, Omar SV, Hedge J, Del Ojo Elias C, Bradley P, Iqbal Z, Feuerriegel S,  
386 Niehaus KE, Wilson DJ, Clifton DA, Kapatai G, Ip CLC, Bowden R, Drobniewski FA, Allix-Beguec  
387 C, Gaudin C, Parkhill J, Diel R, Supply P, Crook DW, Smith EG, Walker AS, Ismail N, Niemann S,  
388 Peto TEA, Modernizing Medical Microbiology Informatics G. 2015. Whole-genome  
389 sequencing for prediction of Mycobacterium tuberculosis drug susceptibility and resistance:  
390 a retrospective cohort study. *Lancet Infect Dis* 15:1193-1202.
- 391 21. Coll F, Phelan J, Hill-Cawthorne GA, Nair MB, Mallard K, Ali S, Abdallah AM, Alghamdi S,  
392 Alsomali M, Ahmed AO, Portelli S, Oppong Y, Alves A, Bessa TB, Campino S, Caws M,  
393 Chatterjee A, Crampin AC, Dheda K, Furnham N, Glynn JR, Grandjean L, Minh Ha D, Hasan R,  
394 Hasan Z, Hibberd ML, Joloba M, Jones-Lopez EC, Matsumoto T, Miranda A, Moore DJ, Mocillo  
395 N, Panaiotov S, Parkhill J, Penha C, Perdigao J, Portugal I, Rchiad Z, Robledo J, Sheen P,  
396 Shesha NT, Sirgel FA, Sola C, Oliveira Sousa E, Streicher EM, Helden PV, Viveiros M, Warren  
397 RM, McNerney R, Pain A, et al. 2018. Genome-wide analysis of multi- and extensively drug-  
398 resistant Mycobacterium tuberculosis. *Nat Genet* 50:307-316.
- 399 22. Vincent V, Rigouts L, Nduwamahoro E, Holmes B, Cunningham J, Guillerm M, Nathanson CM,  
400 Moussy F, De Jong B, Portaels F, Ramsay A. 2012. The TDR Tuberculosis Strain Bank: a  
401 resource for basic science, tool development and diagnostic services. *Int J Tuberc Lung Dis*  
402 16:24-31.



- 403 23. Coll F, McNerney R, Guerra-Assuncao JA, Glynn JR, Perdigo J, Viveiros M, Portugal I, Pain A,  
404 Martin N, Clark TG. 2014. A robust SNP barcode for typing *Mycobacterium tuberculosis*  
405 complex strains. *Nat Commun* 5:4812.
- 406 24. Rigouts L, Gumusboga M, de Rijk WB, Nduwamahoro E, Uwizeye C, de Jong B, Van Deun A.  
407 2013. Rifampin resistance missed in automated liquid culture system for *Mycobacterium*  
408 *tuberculosis* isolates with specific *rpoB* mutations. *J Clin Microbiol* 51:2641-5.
- 409 25. Tagliani E, Hassan MO, Waberi Y, De Filippo MR, Falzon D, Dean A, Zignol M, Supply P,  
410 Abdoukader MA, Hassangue H, Cirillo DM. 2017. Culture and Next-generation sequencing-  
411 based drug susceptibility testing unveil high levels of drug-resistant-TB in Djibouti: results  
412 from the first national survey. *Sci Rep* 7:17672.
- 413 26. El Achkar S, Demanche C, Osman M, Rafei R, Ismail MB, Yaacoub H, Pincon C, Duthoy S, De  
414 Matos F, Gaudin C, Trovato A, Cirillo DM, Hamze M, Supply P. 2019. Drug-Resistant  
415 Tuberculosis, Lebanon, 2016 - 2017. *Emerg Infect Dis* 25:564-568.
- 416 27. Kohl TA, Utpatel C, Schleusener V, De Filippo MR, Beckert P, Cirillo DM, Niemann S. 2018.  
417 MTBseq: a comprehensive pipeline for whole genome sequence analysis of *Mycobacterium*  
418 *tuberculosis* complex isolates. *PeerJ* 6:e5895.
- 419 28. Lawn SD, Nicol MP. 2011. Xpert(R) MTB/RIF assay: development, evaluation and  
420 implementation of a new rapid molecular diagnostic for tuberculosis and rifampicin  
421 resistance. *Future Microbiol* 6:1067-82.
- 422 29. HainLifescience. 2015. GenoType MTBDR*plus* VER 2.0 Molecular Genetic Assay for Identification of  
423 the *M. tuberculosis* Complex and its Resistance to Rifampicin and Isoniazid from Clinical Specimens  
424 and Cultivated Samples.
- 425 30. Andre E, Isaacs C, Affolabi D, Alagna R, Brockmann D, de Jong BC, Cambau E, Churchyard G,  
426 Cohen T, Delmee M, Delvenne JC, Farhat M, Habib A, Holme P, Keshavjee S, Khan A, Lightfoot  
427 P, Moore D, Moreno Y, Mundade Y, Pai M, Patel S, Nyaruhirira AU, Rocha LE, Takle J, Trebucq  
428 A, Creswell J, Boehme C. 2016. Connectivity of diagnostic technologies: improving  
429 surveillance and accelerating tuberculosis elimination. *Int J Tuberc Lung Dis* 20:999-1003.
- 430 31. Rigouts L, Coeck N, Gumusboga M, de Rijk WB, Aung KJ, Hossain MA, Fissette K, Rieder HL,  
431 Meehan CJ, de Jong BC, Van Deun A. 2016. Specific *gyrA* gene mutations predict poor  
432 treatment outcome in MDR-TB. *J Antimicrob Chemother* 71:314-23.

433

434 **Tables**

435 Table 1. Proportions of minority resistant variants detected among the rifampicin-  
 436 resistant:rifampicin-susceptible mixtures by targeted deep sequencing (Deeplex-MycTB).  
 437 The values represent the percentage of sequence reads bearing the indicated *rpoB*  
 438 mutation. Gray boxes represent proportions below the nominal threshold of 3% for calling  
 439 minority resistant variants used in the Deeplex-MycTB application.

| <b>Minority resistant variant proportion detected for each specific</b> |                                  |                      |                      |                      |
|-------------------------------------------------------------------------|----------------------------------|----------------------|----------------------|----------------------|
| <b>RR:RS</b>                                                            | <b>mutation by Deeplex-MycTB</b> |                      |                      |                      |
| <b>proportions</b>                                                      | <b>TB-TDR-0036</b>               | <b>TB-TDR-0090</b>   | <b>TB-TDR-0100</b>   | <b>TB-TDR-0131</b>   |
|                                                                         | <b>(H445D/H526D)</b>             | <b>(S450L/S531L)</b> | <b>(D435V/D516V)</b> | <b>(H445Y/H526Y)</b> |
| 0:100                                                                   | 0.03                             | 0.05                 | 0.0                  | 0.03                 |
| 1:99                                                                    | 1.3                              | 1.3                  | 1.6                  | 1.0                  |
| 5:95                                                                    | 7.5                              | 5.0                  | 6.0                  | 4.3                  |
| 10:90                                                                   | 14.7                             | 10.0                 | 10.0                 | 8.7                  |
| 20:80                                                                   | 28.6                             | 21.7                 | 25.2                 | 20.8                 |
| 30:70                                                                   | 39.9                             | 28.4                 | 35.4                 | 26.0                 |
| 40:60                                                                   | 55.9                             | 41.6                 | 43.6                 | 37.9                 |
| 50:50                                                                   | 60.0                             | 50.1                 | 60.6                 | 46.0                 |
| 60:40                                                                   | 69.4                             | 61.9                 | 67.0                 | 57.5                 |
| 70:30                                                                   | 77.6                             | 64.9                 | 69.6                 | 66.7                 |
| 80:20                                                                   | 85.5                             | 69.8                 | 86.2                 | 79.0                 |
| 100:0                                                                   | 98.3                             | 99.9                 | 98.3                 | 98.9                 |

440

441 Table 2. (Range of) limits of detection for rifampicin heteroresistance among triplicates, tested by different rapid diagnostic tests, per mutation  
 442 type, with quantification of the respective lowest proportion by targeted deep sequencing (Deeplex-MycTB).

| Strain ID   | Rifampicin resistance-conferring mutation |        | LPA-Hain            | Deeplex            | LPA-Nipro           | Deeplex            | Xpert               | Deeplex            | Ultra               | Deeplex            |
|-------------|-------------------------------------------|--------|---------------------|--------------------|---------------------|--------------------|---------------------|--------------------|---------------------|--------------------|
|             |                                           |        | %LOD <sup>1,a</sup> | %QP <sup>1,b</sup> | %LOD <sup>1,a</sup> | %QP <sup>1,b</sup> | %LOD <sup>1,a</sup> | %QP <sup>1,b</sup> | %LOD <sup>2,a</sup> | %QP <sup>2,b</sup> |
| TB-TDR-0036 | H445D*                                    | H526D^ | 5-10                | 7.5                | 5                   | 7.5                | 40-60               | 55.9               | 40-60               |                    |
| TB-TDR-0090 | S450L*                                    | S531L^ | 5                   | 5                  | 1-5                 | 5                  | 20-40               | 21.7               | 20-30               | 21.7               |
| TB-TDR-0100 | D435V*                                    | D516V^ | 5-10                | 6                  | 5-10                | 6                  | 70-80               | 69.6               | 40-50               |                    |
| TB-TDR-0131 | H445Y*                                    | H526Y^ | 5-10                | 4.3                | 10                  | 8.7                | 70-80               | 66.7               | 60-70               |                    |

443 \*in *M. tuberculosis* numbering; ^in *E.coli* numbering ; Deeplex-MycTB = targeted deep sequencing; RDTs rapid diagnostic tests; LPA-Hain =  
 444 Genotype MTDBRplus v2.0; LPA-Nipro = Genoscholar NTM + MTB II; Xpert = classic Xpert MTB/RIF; Ultra = Xpert MTB/RIF Ultra; <sup>1</sup> = batch 1; <sup>2</sup> =  
 445 batch 2; <sup>a</sup>Limit of detection (range) among triplicates for the RDTs; <sup>b</sup>quantified proportion of minority resistant variants determined by Deeplex  
 446 on replicate 3.

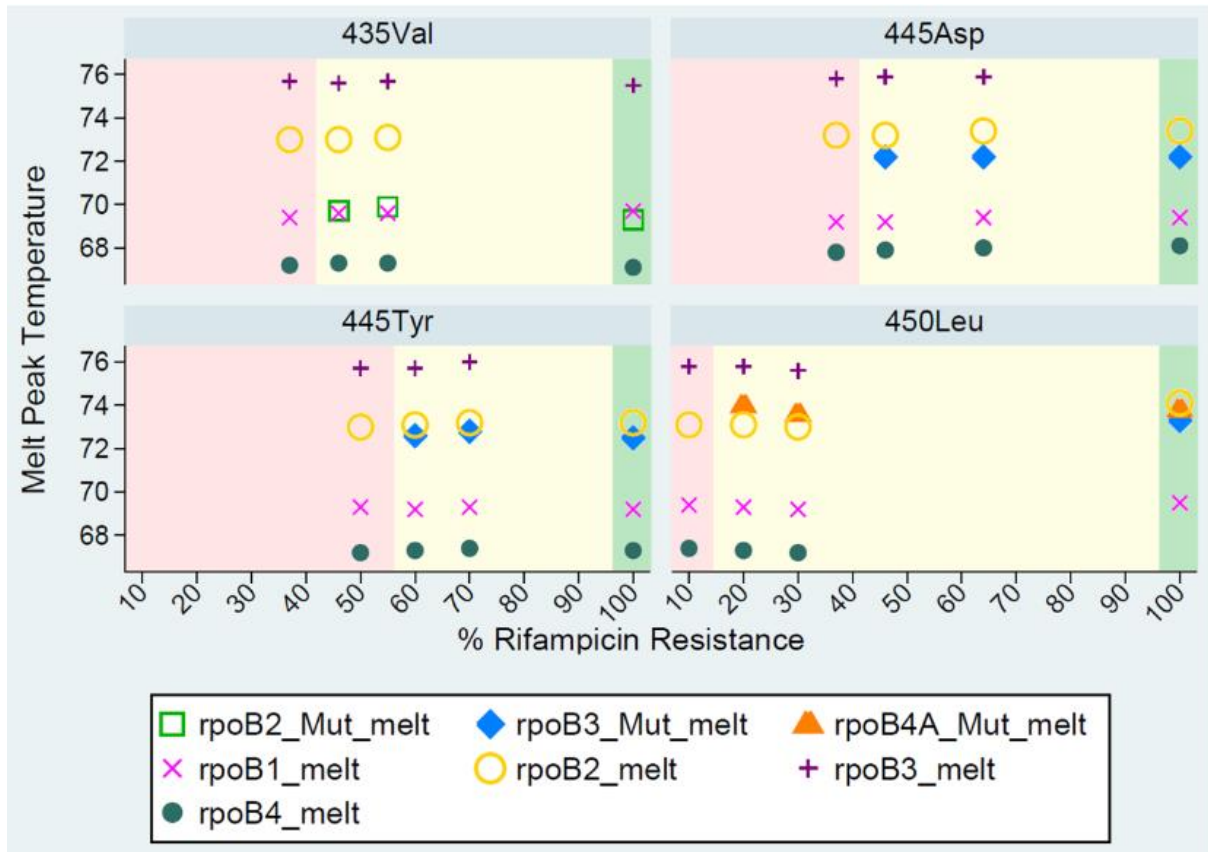

447

448 Figure 1. Presence/absence of Xpert Ultra wild-type and mutant melt probes detected for  
449 the rifampicin-susceptible(RS):rifampicin-resistant(RR) mixtures per mutation type at various  
450 proportions of the minority resistant variants: at the limit of detection (LOD) reported as  
451 (hetero)resistant (shaded in yellow), below LOD reported as RS (shaded in pink), and at full  
452 RR reported as resistant (shaded in green).
